# Supplementary material for: Detection and imaging of Hg(II) in vivo using glutathione-functionalized gold nanoparticles
Source: publisher site journal article supplement (doi:10.3762/bjnano.13.46), 2022-06-23
Supplement: Additional file 1 [file 2190-4286-13-46-S1.pdf]

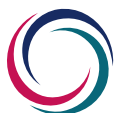

## Supporting Information

for

### Detection and imaging of Hg(II) in vivo using glutathione-functionalized gold nanoparticles

Gufeng Li, Shaoqing Li, Rui Wang, Min Yang, Lizhu Zhang, Yanli Zhang, Wenrong Yang and Hongbin Wang

*Beilstein J. Nanotechnol.* **2022**, *13*, 549–559. [doi:10.3762/bjnano.13.46](https://doi.org/10.3762/bjnano.13.46)

## Additional experimental data

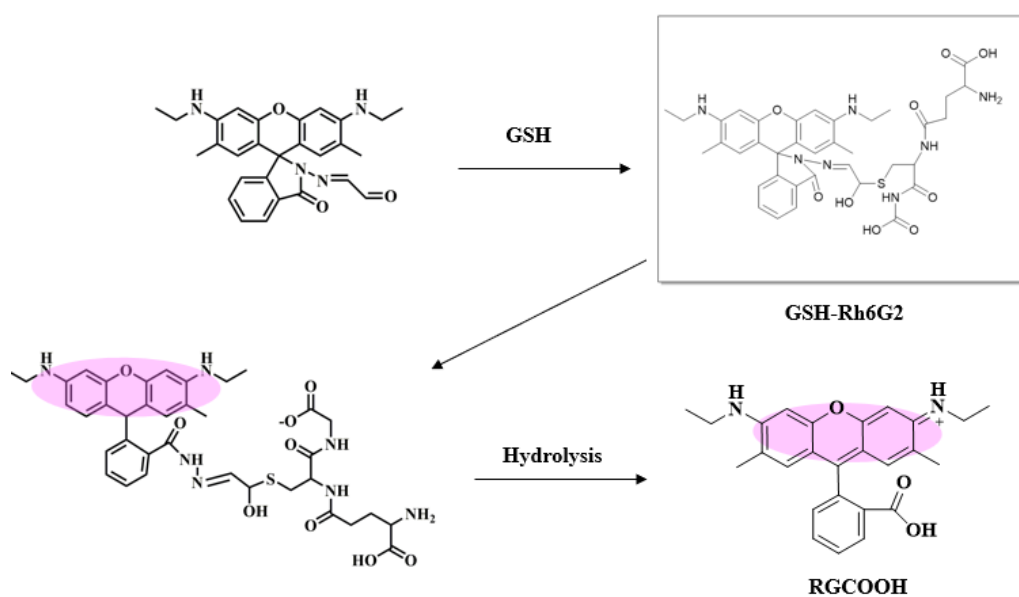

**Figure S1:** Speculative scheme of the reaction between Rh6G2 and GSH.

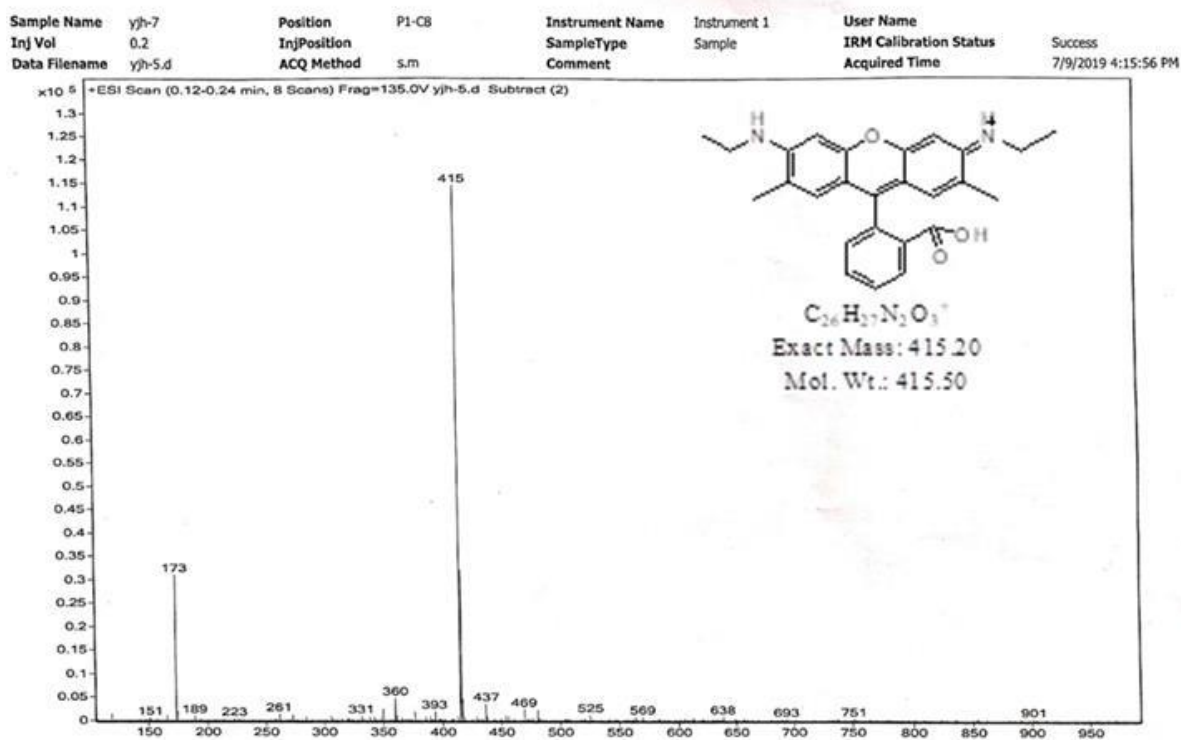

**Figure S2:** Mass spectra of GSH-Rh6G2. The fluorescent substance of GSH-Rh6G2 was separated, which proved that  $m/z$  is 415 as RGCOOH.

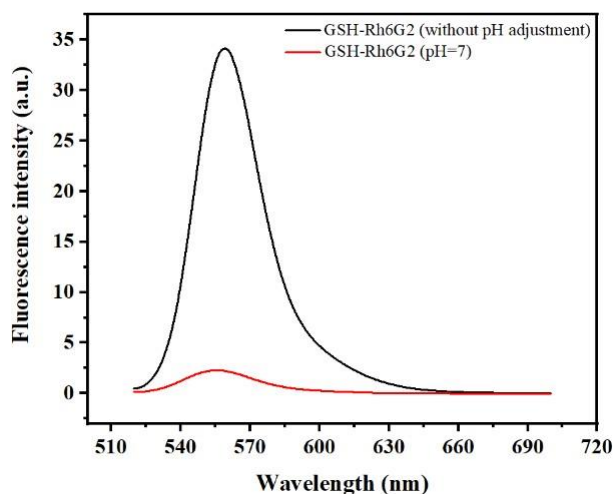

**Figure S3:** Fluorescence spectra of GSH-RH6G2 in weakly acidic environment (black curve) and in neutral environment (red curve).

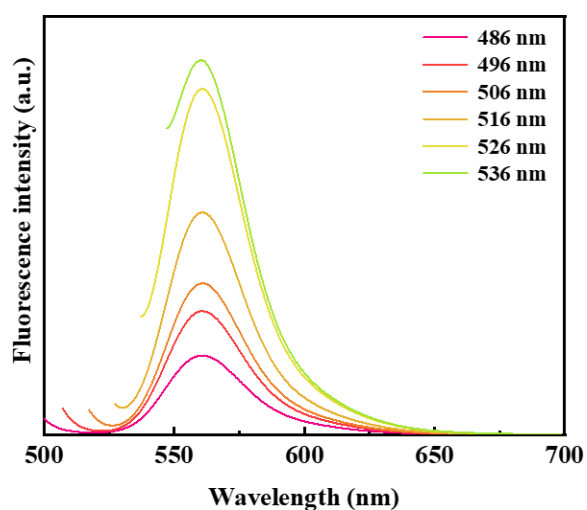

**Figure S4:** Fluorescence emission spectra of the GNPs-GSH-Rh6G2 with different excitation wavelengths.

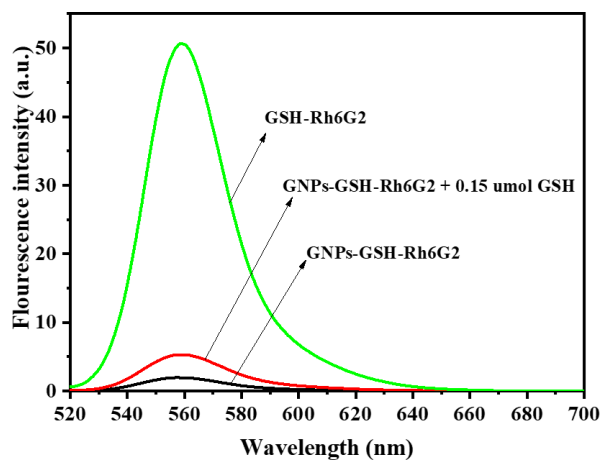

**Figure S5:** Fluorescence spectra of molecular saturation test of GNPs-GSH-RH6G2
